# Supplementary material
Source: PubMed Central journal article supplement (PMC3181338)

# Heatmap of Markers in LMS

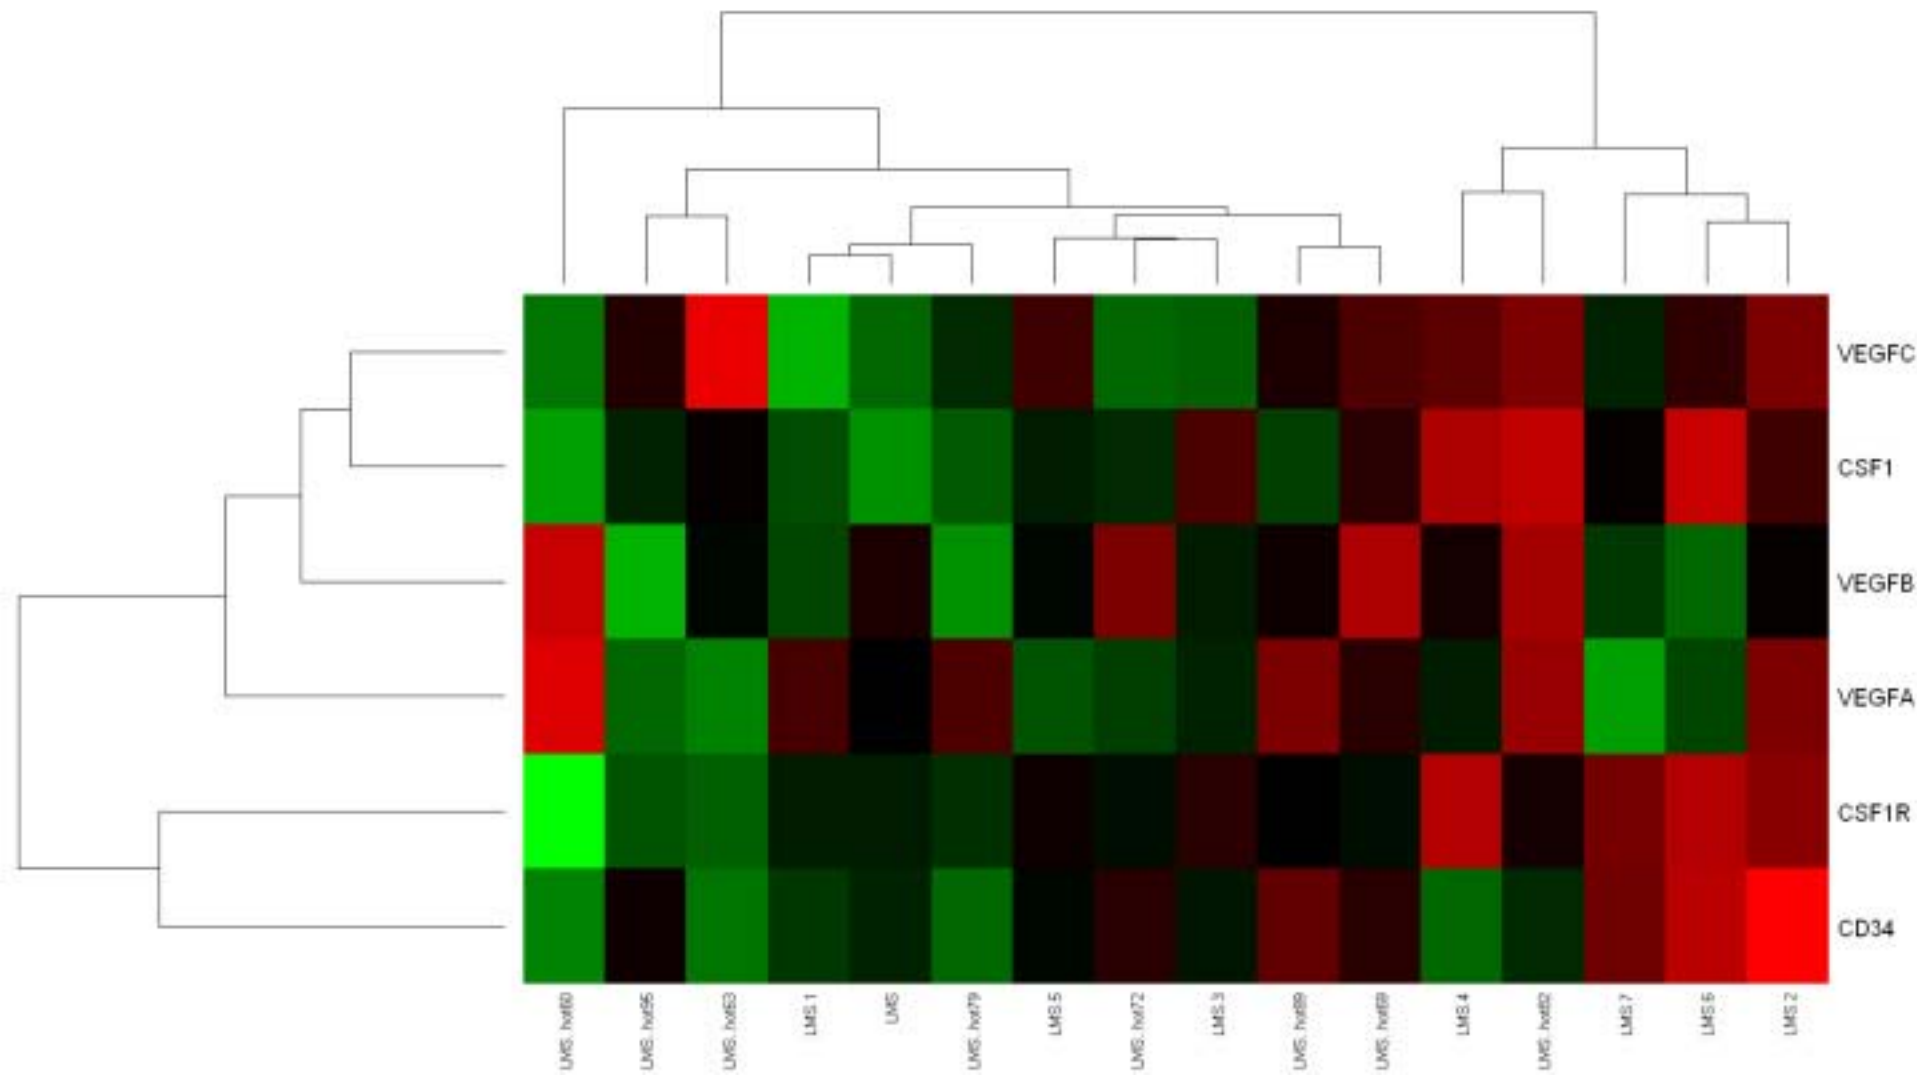

Supplement: mmc2.pdf [file mmc2.pdf]
